# Supplementary material
Source: publisher figshare collection journal article supplement (https://acs.figshare.com/ndownloader/files/3896056)
Supplement: Supplementary file 1 [file 3896056]

# CIF file generated by openbabel 2.3.2, see http://openbabel.sf.net
data_I
_chemical_name_common ''
_cell_length_a 22.0869
_cell_length_b 23.3788
_cell_length_c 23.6884
_cell_angle_alpha 89.9415
_cell_angle_beta 90.2795
_cell_angle_gamma 89.9914
loop_
    _atom_site_type_symbol
    _atom_site_label
    _atom_site_Cartn_x
    _atom_site_Cartn_y
    _atom_site_Cartn_z
      C    C1     0.09147    1.30661   23.37379
      C    C2    -0.02965   13.02332   11.48570
      C    C3    11.19142    1.27166   11.50512
      C    C4    10.98261   12.84609   23.34359
      C    C5    16.64903    7.11071   17.48317
      C    C6     5.58190    7.15517    5.68792
      C    C7     5.58257   18.83547   17.42310
      C    C8    16.62344   18.84378    5.42422
      C    C9     4.74277    8.10004    6.57317
      C    C10     5.19280    8.52509    7.76633
      C    C11     4.46797    9.35238    8.53383
      C    C12     3.24938    9.79979    8.15307
      C    C13     2.83841    9.41384    6.92325
      C    C14     3.57618    8.61019    6.14541
      C    C15     2.47832   10.59531    8.95709
      H    H16     6.17409    8.18828    8.14196
      H    H17     4.90541    9.61459    9.50921
      H    H18     1.89224    9.76966    6.48763
      H    H19     3.20038    8.36929    5.13632
      C    C20     2.94860   11.14613   10.10009
      C    C21     2.18673   11.92339   10.88513
      C    C22     0.90341   12.18030   10.58188
      C    C23     0.41533   11.60925    9.46482
      C    C24     1.18416   10.85781    8.66629
      H    H25     3.99024   11.00381   10.42620
      H    H26     2.64385   12.34600   11.79372
      H    H27    21.44114   11.74567    9.19136
      H    H28     0.68537   10.42821    7.78422
      C    C29    15.76813    7.95928   18.43543
      C    C30    16.33306    8.95351   19.14707
      C    C31    15.60332    9.75514   19.93458
      C    C32    14.27443    9.57581   20.08093
      C    C33    13.72725    8.53681   19.42311
      C    C34    14.45795    7.72855   18.63738
      C    C35    13.49247   10.37071   20.85994
      H    H36    17.42072    9.13210   19.07677
      H    H37    16.14549   10.54991   20.47017
      H    H38    12.63757    8.37691   19.52165
      H    H39    13.97107    6.86464   18.15705
      C    C40    13.94061   11.51819   21.40843
      C    C41    13.15209   12.28909   22.16911
      C    C42    11.88817   11.93287   22.47461
      C    C43    11.43078   10.80076   21.90726
      C    C44    12.20699   10.04633   21.11309
      H    H45    14.96001   11.88988   21.22028
      H    H46    13.57171   13.24284   22.52992
      H    H47    10.39648   10.46671   22.07608
      H    H48    11.76254    9.12891   20.68993
      C    C49    15.75394   19.81466    6.27472
      C    C50    16.25744   20.94750    6.79766
      C    C51    15.53389   21.74929    7.59258
      C    C52    14.24700   21.48277    7.90460
      C    C53    13.74525   20.34172    7.38093
      C    C54    14.48292   19.52231    6.61538
      C    C55    13.51036   22.29410    8.72648
      H    H56    17.29471   21.24905    6.59806
      H    H57    16.04239   22.65501    7.95736
      H    H58    12.72320   20.00224    7.61075
      H    H59    14.01907   18.57653    6.28893
      C    C60    14.07407   23.28664    9.45324
      C    C61    13.36239    0.65215   10.31638
      C    C62    12.04464    0.45623   10.49684
      C    C63    11.46020   22.92006    9.70367
      C    C64    12.17302   22.15147    8.86705
      H    H65    15.14967    0.12005    9.40690
      H    H66    13.89704    1.43222   10.88232
      H    H67    10.36580   22.77677    9.74803
      H    H68    11.60429   21.41668    8.27620
      C    C69     6.34246    8.13920    4.76818
      C    C70     5.88129    8.43983    3.53903
      C    C71     6.57113    9.22727    2.70416
      C    C72     7.73922    9.78972    3.07270
      C    C73     8.13902    9.57645    4.34629
      C    C74     7.45179    8.77914    5.17758
      C    C75     8.50343   10.52268    2.22097
      H    H76     4.92791    8.01953    3.17740
      H    H77     6.14174    9.38370    1.70242
      H    H78     9.06551   10.03264    4.73537
      H    H79     7.82973    8.63461    6.20415
      C    C80     9.64207   11.06801    2.67484
      C    C81    10.46974   11.75585    1.87951
      C    C82    10.17896   11.97522    0.58249
      C    C83     9.03705   11.42422    0.12116
      C    C84     8.21872   10.71857    0.91727
      H    H85     9.89037   10.94096    3.74312
      H    H86    11.39242   12.14096    2.33375
      H    H87     8.62836   11.57792   22.75285
      H    H88     7.31200   10.30097    0.45263
      C    C89    17.47172   17.97678    6.38731
      C    C90    16.99766   17.58026    7.58069
      C    C91    17.70880   16.77837    8.38729
      C    C92    18.93990   16.32749    8.05251
      C    C93    19.39686   16.71654    6.84072
      C    C94    18.67743   17.50005    6.02623
      C    C95    19.67475   15.51967    8.87908
      H    H96    16.00027   17.90342    7.91988
      H    H97    17.23788   16.52476    9.34906
      H    H98    20.36632   16.37680    6.44615
      H    H99    19.09444   17.73083    5.03097
      C    C100    20.96040   15.19826    8.61210
      C    C101    21.68426   14.42105    9.42896
      C    C102    21.16461   13.88844   10.55274
      C    C103    19.88609   14.20143   10.82381
      C    C104    19.16708   14.99705   10.01798
      H    H105    21.48834   15.58795    7.72869
      H    H106     0.65219   14.23384    9.16126
      H    H107    19.38591   13.81208   11.72185
      H    H108    18.12721   15.18138   10.32775
      C    C109     6.46468    6.21366    6.53837
      C    C110     5.92454    5.54742    7.57403
      C    C111     6.65408    4.71785    8.33478
      C    C112     7.97160    4.50674    8.10858
      C    C113     8.48973    5.14624    7.03376
      C    C114     7.75295    5.95639    6.25809
      C    C115     8.73174    3.70034    8.91675
      H    H116     4.85764    5.68656    7.82053
      H    H117     6.12485    4.24643    9.17668
      H    H118     9.53746    5.00683    6.72650
      H    H119     8.23436    6.40890    5.37552
      C    C120    10.07847    3.63437    8.80489
      C    C121    10.82522    2.87677    9.62159
      C    C122    10.27325    2.12005   10.58797
      C    C123     8.93375    2.15095   10.68750
      C    C124     8.18828    2.92883    9.88697
      H    H125    10.63074    4.22947    8.06182
      H    H126    11.92123    2.88994    9.49192
      H    H127     8.40943    1.53037   11.43062
      H    H128     7.10040    2.88128   10.04729
      C    C129     6.46301   17.93952   18.33864
      C    C130     5.93864   17.38773   19.45092
      C    C131     6.65510   16.58366   20.24807
      C    C132     7.93702   16.25600   19.97116
      C    C133     8.45002   16.80187   18.84578
      C    C134     7.73894   17.62288   18.05976
      C    C135     8.66584   15.42204   20.77589
      H    H136     4.88615   17.58177   19.72374
      H    H137     6.12482   16.17895   21.12328
      H    H138     9.48837   16.61746   18.53132
      H    H139     8.24469   18.03199   17.17352
      C    C140     9.89393   14.97391   20.42789
      C    C141    10.60321   14.15112   21.21367
      C    C142    10.13025   13.72852   22.39845
      C    C143     8.92507   14.19793   22.77131
      C    C144     8.20733   15.00361   21.97714
      H    H145    10.36560   15.24887   19.47248
      H    H146    11.59922   13.83564   20.86401
      H    H147     8.62481   13.92112    0.07369
      H    H148     7.23922   15.33682   22.38050
      C    C149    17.44045    8.01297   16.49813
      C    C150    17.21700    9.33471   16.38402
      C    C151    17.95266   10.10887   15.57578
      C    C152    18.92594    9.60547   14.78583
      C    C153    19.08147    8.26082   14.83688
      C    C154    18.36227    7.48895   15.67001
      C    C155    19.68968   10.41418   13.98442
      H    H156    16.41515    9.82707   16.95602
      H    H157    17.69462   11.17898   15.56794
      H    H158    19.83443    7.74188   14.22409
      H    H159    18.54846    6.40063   15.67790
      C    C160    20.53350    9.91956   13.05070
      C    C161    21.26865   10.71571   12.25812
      C    C162    21.22077   12.05615   12.36370
      C    C163    20.41770   12.55458   13.31674
      C    C164    19.66198   11.76386   14.08938
      H    H165    20.63402    8.83697   12.87804
      H    H166    21.92275   10.23013   11.51680
      H    H167    20.37279   13.64676   13.46958
      H    H168    19.04814   12.28569   14.83790
      C    C169     0.78890   13.95314   12.41842
      C    C170     1.29573   13.49421   13.57707
      C    C171     2.04836   14.26890   14.37394
      C    C172     2.34869   15.55267   14.06327
      C    C173     1.83435   16.00051   12.89557
      C    C174     1.08374   15.22558   12.09865
      C    C175     3.12756   16.34430   14.87080
      H    H176     1.10808   12.45188   13.88831
      H    H177     2.41263   13.79149   15.29569
      H    H178     2.01333   17.02479   12.53584
      H    H179     0.71548   15.67209   11.16276
      C    C180     3.42507   17.63030   14.56679
      C    C181     4.19184   18.39671   15.35944
      C    C182     4.71790   17.92673   16.50590
      C    C183     4.42079   16.65324   16.81936
      C    C184     3.65411   15.88825   16.02941
      H    H185     3.04893   18.11398   13.65295
      H    H186     4.38480   19.43914   15.05078
      H    H187     4.80581   16.19158   17.74040
      H    H188     3.48210   14.86083   16.38317
      C    C189    12.05484    2.16594   12.43038
      C    C190    13.00578    1.61172   13.20688
      C    C191    13.77386    2.35564   14.02002
      C    C192    13.61335    3.69376   14.11612
      C    C193    12.62608    4.22781   13.37416
      C    C194    11.86531    3.49278   12.55207
      C    C195    14.37019    4.50098   14.91462
      H    H196    13.16813    0.51975   13.17660
      H    H197    14.53646    1.81963   14.60580
      H    H198    12.42974    5.30913   13.44996
      H    H199    11.07462    4.01171   11.98789
      C    C200    14.15540    5.83586   14.95849
      C    C201    14.87319    6.64509   15.75617
      C    C202    15.83656    6.16223   16.56322
      C    C203    16.08920    4.84239   16.48465
      C    C204    15.37095    4.03326   15.69117
      H    H205    13.37239    6.30238   14.33621
      H    H206    14.65809    7.72787   15.74769
      H    H207    16.90163    4.38959   17.07607
      H    H208    15.64040    2.96584   15.70493
      C    C209    11.95461   13.76935    0.53886
      C    C210    13.03336   13.31330    1.20286
      C    C211    13.76455   14.11149    1.99248
      C    C212    13.46114   15.41722    2.17386
      C    C213    12.36857   15.86081    1.51301
      C    C214    11.63669   15.06211    0.72519
      C    C215    14.20981   16.23753    2.97449
      H    H216    13.33377   12.25408    1.11109
      H    H217    14.62615   13.63591    2.48384
      H    H218    12.01997   16.90125    1.59099
      H    H219    10.75902   15.50737    0.23224
      C    C220    13.91898   17.54851    3.13988
      C    C221    14.66242   18.35091    3.91403
      C    C222    15.73733   17.89147    4.58114
      C    C223    16.03831   16.59189    4.41790
      C    C224    15.29647   15.79030    3.64283
      H    H225    13.06608   18.02756    2.63679
      H    H226    14.38313   19.41759    3.98173
      H    H227    16.91411   16.14626    4.91441
      H    H228    15.63269   14.74474    3.58110
      C    C229    10.40462    0.35203   12.48114
      C    C230    10.46503   22.38772   12.44367
      C    C231     9.70785   21.62513   13.24400
      C    C232     8.87551   22.15268   14.16852
      C    C233     8.88567    0.12466   14.26003
      C    C234     9.62632    0.88878   13.43983
      C    C235     8.07799   21.36314   14.95669
      H    H236    11.13965   21.86499   11.74947
      H    H237     9.82435   20.53749   13.12139
      H    H238     8.25691    0.66295   14.98559
      H    H239     9.57172    1.98606   13.55035
      C    C240     7.36966   21.85916   15.99601
      C    C241     6.59487   21.08255   16.76919
      C    C242     6.45965   19.76383   16.53908
      C    C243     7.13967   19.26448   15.49091
      C    C244     7.93370   20.03565   14.73329
      H    H245     7.41829   22.92315   16.27394
      H    H246     6.06580   21.56684   17.60474
      H    H247     7.05123   18.19310   15.23695
      H    H248     8.43553   19.52862   13.89528
      C    C249     4.68580   19.71110   18.33597
      C    C250     5.16774   20.19580   19.49668
      C    C251     4.42263   20.96154   20.30476
      C    C252     3.16312   21.33054   19.98168
      C    C253     2.70426   20.87590   18.79279
      C    C254     3.43949   20.08273   17.99822
      C    C255     2.41171   22.12794   20.80259
      H    H256     6.20467   19.97388   19.80392
      H    H257     4.91298   21.31031   21.22653
      H    H258     1.68935   21.10911   18.43603
      H    H259     2.98863   19.74107   17.05373
      C    C260     1.24589   22.68219   20.39866
      C    C261     0.52768    0.11402   21.19245
      C    C262     0.93183    0.41027   22.43977
      C    C263     2.05434   23.18821   22.87740
      C    C264     2.78546   22.40273   22.07393
      H    H265     0.84591   22.52160   19.38585
      H    H266    21.67625    0.53652   20.79505
      H    H267     2.50460   23.30974    0.23101
      H    H268     3.68724   21.95908   22.52315
      C    C269    17.53319    6.31369   18.47438
      C    C270    18.87473    6.39497   18.53492
      C    C271    19.57323    5.63273   19.38845
      C    C272    18.97967    4.77237   20.23566
      C    C273    17.63117    4.74313   20.21687
      C    C274    16.92939    5.49287   19.35626
      C    C275    19.73652    3.97614   21.03925
      H    H276    19.43726    7.08335   17.88615
      H    H277    20.67191    5.72232   19.40802
      H    H278    17.05212    4.07764   20.87543
      H    H279    15.82891    5.40797   19.36652
      C    C280    19.19960    3.18417   21.99055
      C    C281    19.95587    2.37758   22.74669
      C    C282    21.28506    2.28325   22.56695
      C    C283    21.83385    3.10050   21.64730
      C    C284    21.08055    3.93016   20.90693
      H    H285    18.11841    3.17945   22.19831
      H    H286    19.44464    1.78174   23.51795
      H    H287     0.83705    3.08340   21.47711
      H    H288    21.59641    4.55452   20.15720
      C    C289     1.05296    2.21309    0.58114
      C    C290     2.31043    2.57556    0.28210
      C    C291     3.03435    3.33138    1.11976
      C    C292     2.53502    3.79202    2.29102
      C    C293     1.23969    3.48802    2.53470
      C    C294     0.51969    2.73161    1.69872
      C    C295     3.28625    4.53552    3.16203
      H    H296     2.66559    2.26610   23.03026
      H    H297     4.06158    3.55308    0.79443
      H    H298     0.70802    3.82646    3.43518
      H    H299    21.56365    2.49793    1.97113
      C    C300     4.58694    4.82201    2.92496
      C    C301     5.30425    5.59954    3.74625
      C    C302     4.75511    6.16376    4.83576
      C    C303     3.49905    5.80025    5.14129
      C    C304     2.78098    5.02024    4.32047
      H    H305     5.12021    4.44167    2.04123
      H    H306     6.35876    5.80279    3.49016
      H    H307     3.02146    6.16036    6.06778
      H    H308     1.74904    4.81175    4.63984
      C    C309    17.54750   19.64354    4.46014
      C    C310    18.66661   20.24082    4.91445
      C    C311    19.45437   20.97995    4.11680
      C    C312    19.17431   21.13635    2.80891
      C    C313    18.06770   20.51956    2.34801
      C    C314    17.27492   19.79978    3.15201
      C    C315    19.97482   21.90855    2.02782
      H    H316    18.94079   20.11402    5.97191
      H    H317    20.35200   21.48234    4.53490
      H    H318    17.75681   20.59173    1.29460
      H    H319    16.39020   19.33753    2.69189
      C    C320    19.74425   22.10562    0.71214
      C    C321    20.38585   22.95921   23.67079
      C    C322    21.50413    0.25697    0.53528
      C    C323    21.80810   23.35985    1.81873
      C    C324    21.05161   22.53002    2.55090
      H    H325    18.91722   21.60816    0.18313
      H    H326    20.14568   23.08165   22.60061
      H    H327     0.58786    0.44508    2.30978
      H    H328    21.33222   22.38515    3.60841
